# Supplementary material for: Settable Polymeric Autograft Extenders in a Rabbit Radius Model of Bone Formation
Source: MDPI journal article supplement (doi:10.3390/ma14143960), 2021-07-15
Supplement: s1 [file s1]

Article

# Settable Polymeric Autograft Extenders in a Rabbit Radius Model of Bone Formation

Lauren A. Boller <sup>1</sup>, Madison A.P. McGough <sup>1</sup>, Stefanie M. Shiels <sup>2</sup>, Craig L. Duvall <sup>1</sup>, Joseph C. Wenke <sup>2</sup> and Scott A. Guelcher <sup>1,3,4,\*</sup>

<sup>1</sup> Department of Biomedical Engineering, Vanderbilt University, 2201 West End Ave, Nashville, TN 37235, USA; lauen.a.boller@vanderbilt.edu (L.A.B.); madison.a.mcgough@gmail.com (M.A.P.M.); craig.duvall@vanderbilt.edu (C.L.D.)

<sup>2</sup> U.S. Army Institute of Surgical Research, 3698 Chambers Rd, San Antonio, TX 78234, USA; stefanie.m.shiels.ctr@mail.mil (S.M.S.); joseph.c.wenke.civ@mail.mil (J.C.W.)

<sup>3</sup> Department of Chemical and Biomolecular Engineering, Vanderbilt University, 2201 West End Ave, Nashville, TN 37235, USA

<sup>4</sup> Vanderbilt Center for Bone Biology, Vanderbilt University Medical Center, 1211 Medical Center Dr., Nashville, TN 37212, USA

\* Correspondence: scott.guelcher@vanderbilt.edu

## Supplemental Figures

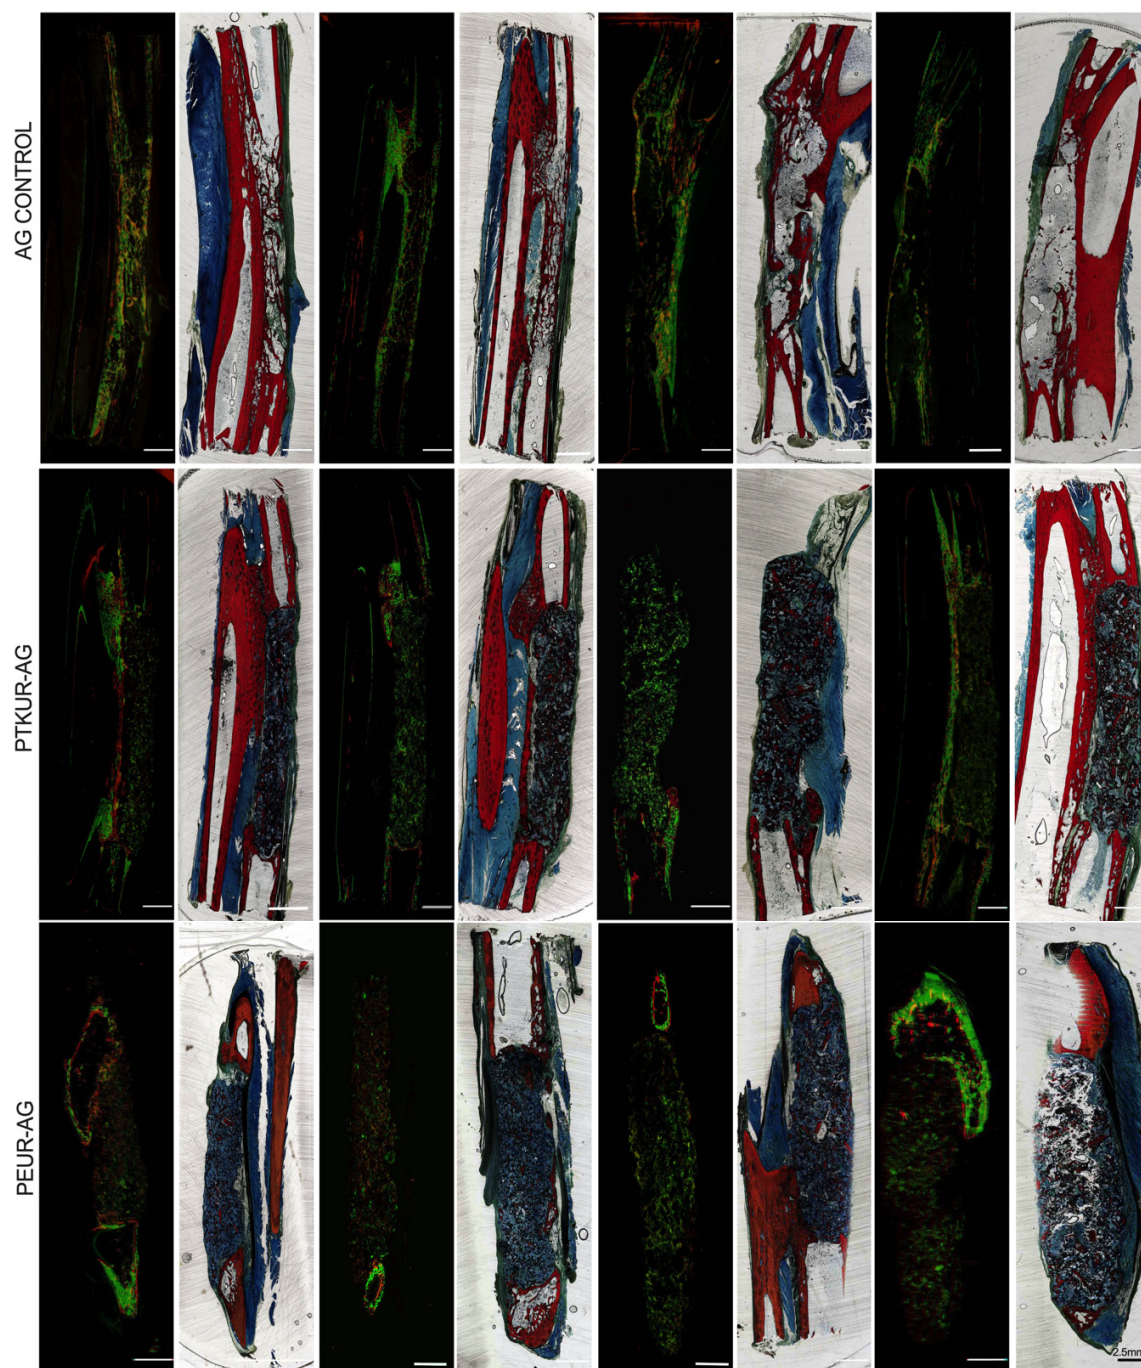

**Figure S1.** Fluorescent and Sanderson's Rapid stained histological sections.

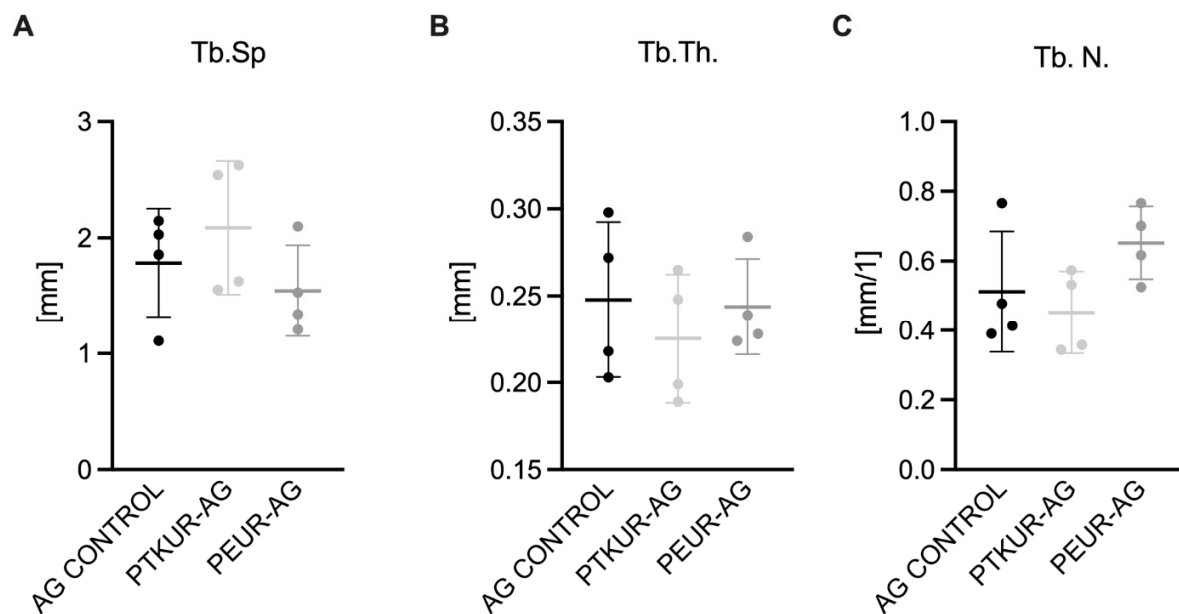

**Figure S2.** Bone Morphometric parameters A) Trabecular Spacing, B) Trabecular Thickening, and C) Trabecular Number.
